# Supplementary material for: Dynamic Association Between Mean Arterial Pressure and 28-Day Mortality in Critically Ill Patients with Systemic Lupus Erythematosus: A Multicenter Retrospective Cohort Study
Source: Research Square preprint supplement (doi:10.21203/rs.3.rs-8318871/v1), 2025-12-22
Supplement: Supplementary file 1 [file 254753d76ffd80a546f1c241.xlsx]

## Sheet: 时序统计汇总
Dataset

## Sheet: 变化趋势分析
Dataset

## Sheet: 数据库基础信息
Dataset
