# Supplementary material for: Dynamic Association Between Mean Arterial Pressure and 28-Day Mortality in Critically Ill Patients with Systemic Lupus Erythematosus: A Multicenter Retrospective Cohort Study
Source: Research Square preprint supplement (doi:10.21203/rs.3.rs-8318871/v1), 2025-12-22
Supplement: Supplementary file 2 [file 310d30cffabba3fdcef22a6b.xlsx]

## Sheet: 缺失值统计
variable

## Sheet: 患者时间点数
stay_id
