# Supplementary material for: Dynamic Association Between Mean Arterial Pressure and 28-Day Mortality in Critically Ill Patients with Systemic Lupus Erythematosus: A Multicenter Retrospective Cohort Study
Source: Research Square preprint supplement (doi:10.21203/rs.3.rs-8318871/v1), 2025-12-22
Supplement: Supplementary file 3 [file 6a383616760bd2ae92d3a8a5.xlsx]

## Sheet: Data
stay_id
