# Supplementary material for: Dynamic Association Between Mean Arterial Pressure and 28-Day Mortality in Critically Ill Patients with Systemic Lupus Erythematosus: A Multicenter Retrospective Cohort Study
Source: Research Square preprint supplement (doi:10.21203/rs.3.rs-8318871/v1), 2025-12-22
Supplement: Supplementary file 5 [file a031e9a1a325c5c4e919590c.docx]

# Table 1. Baseline Characteristics of SLE Patients by Database

| **Characteristics** | **Level** | **MIMIC-III (n=195)** | **MIMIC-IV (n=1167)** | **P value** | **SMD** |
| --- | --- | --- | --- | --- | --- |
| Age, years |  | 66.99 [57.22, 75.54] | 67.00 [55.00, 76.00] | 0.959 | 0.032 |
| Gender | Male | 89 (45.6) | 455 (39.0) | 0.094 | 0.135 |
|  | Female | 106 (54.4) | 712 (61.0) |  |  |
| Body mass index, kg/m² |  | 30.32 [24.77, 35.90] | 27.69 [23.83, 33.24] | 0.001 | 0.222 |
| SAPS II score |  | 37.00 [28.00, 46.00] | 36.00 [27.00, 45.00] | 0.228 | 0.071 |
| SOFA score |  | 5.00 [2.00, 7.00] | 4.00 [2.00, 7.00] | 0.492 | 0.015 |
| Charlson comorbidity index |  | 7.00 [5.00, 9.00] | 6.00 [4.00, 8.00] | 0.001 | 0.255 |
| Heart rate, bpm |  | 84.00 [72.00, 97.00] | 87.00 [75.00, 102.00] | 0.038 | 0.176 |
| Systolic blood pressure, mmHg |  | 122.00 [105.00, 142.50] | 122.00 [106.00, 142.00] | 0.839 | 0.020 |
| Mean arterial pressure, mmHg |  | 78.00 [70.00, 92.00] | 82.00 [70.00, 96.00] | 0.100 | 0.153 |
| SpO2, % |  | 99.00 [96.00, 100.00] | 98.00 [95.00, 100.00] | 0.002 | 0.316 |
| Blood urea nitrogen, mg/dL |  | 34.00 [22.00, 53.00] | 24.00 [15.00, 42.50] | <0.001 | 0.309 |
| White blood cell, 10⁹/L |  | 10.50 [7.15, 14.40] | 10.50 [7.30, 14.40] | 0.984 | 0.041 |
| Platelet, 10⁹/L |  | 202.00 [150.50, 255.50] | 193.00 [137.50, 261.00] | 0.255 | 0.076 |
| Hemoglobin, g/dL |  | 10.00 [9.00, 11.46] | 9.90 [8.60, 11.40] | 0.227 | 0.069 |
| Potassium, mEq/L |  | 4.20 [3.70, 4.70] | 4.20 [3.80, 4.70] | 0.625 | <0.001 |
| Sodium, mEq/L |  | 138.00 [135.50, 141.00] | 138.00 [134.00, 140.00] | 0.009 | 0.208 |
| Mechanical ventilation | No | 101 (51.8) | 742 (63.6) | 0.002 | 0.240 |
|  | Yes | 94 (48.2) | 425 (36.4) |  |  |
| Renal replacement therapy | No | 169 (86.7) | 1089 (93.3) | 0.002 | 0.223 |
|  | Yes | 26 (13.3) | 78 (6.7) |  |  |
| Vasopressor use | No | 135 (69.2) | 792 (67.9) | 0.768 | 0.029 |
|  | Yes | 60 (30.8) | 375 (32.1) |  |  |
| Insulin use | No | 147 (75.4) | 656 (56.2) | <0.001 | 0.413 |
|  | Yes | 48 (24.6) | 511 (43.8) |  |  |
| 28-day mortality | Survived | 163 (83.6) | 994 (85.2) | 0.642 | 0.044 |
|  | Died | 32 (16.4) | 173 (14.8) |  |  |
| 1-year mortality | Survived | 108 (55.4) | 827 (70.9) | <0.001 | 0.325 |
|  | Died | 87 (44.6) | 340 (29.1) |  |  |

Abbreviations: SLE, Systemic lupus erythematosus; SAPS II, Simplified Acute Physiology Score II; SOFA, Sequential Organ Failure Assessment; SpO2, Peripheral oxygen saturation; SMD, Standardized mean difference.

Continuous variables are presented as median [IQR]. Categorical variables are presented as n (%).
