# Supplementary material for: Dynamic Association Between Mean Arterial Pressure and 28-Day Mortality in Critically Ill Patients with Systemic Lupus Erythematosus: A Multicenter Retrospective Cohort Study
Source: Research Square preprint supplement (doi:10.21203/rs.3.rs-8318871/v1), 2025-12-22
Supplement: Supplementary file 6 [file a3e67353da235d5850a5ff2e.xlsx]

## Sheet: Model_Predictions
MAP

## Sheet: Absolute_Risk_Summary
DataSet

## Sheet: OR_by_MAP_Hour
MAP_group

## Sheet: RCS_Analysis
DataSet

## Sheet: Forest_Plot_Data
DataSet

## Sheet: Time_Trend_Results
DataSet
