# Supplementary material for: Dynamic Association Between Mean Arterial Pressure and 28-Day Mortality in Critically Ill Patients with Systemic Lupus Erythematosus: A Multicenter Retrospective Cohort Study
Source: Research Square preprint supplement (doi:10.21203/rs.3.rs-8318871/v1), 2025-12-22
Supplement: Supplementary file 7 [file b746fd054f2b2be07c399f8c.xlsx]

## Sheet: AIC节点选择
Database

## Sheet: 模型结果汇总
Database

## Sheet: 临床解读
Database
