# Supplementary material for: Dynamic Association Between Mean Arterial Pressure and 28-Day Mortality in Critically Ill Patients with Systemic Lupus Erythematosus: A Multicenter Retrospective Cohort Study
Source: Research Square preprint supplement (doi:10.21203/rs.3.rs-8318871/v1), 2025-12-22
Supplement: Supplementary file 8 [file bc3aed751f5e4b26721d5805.xlsx]

## Sheet: Data
stay_id
